# Supplementary material
Source: PubMed Central journal article supplement (PMC1595416)

**A**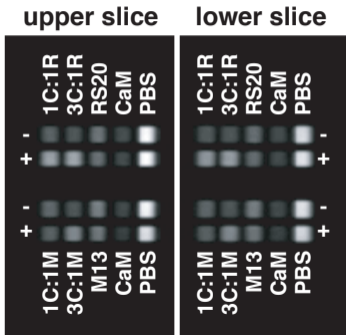**B**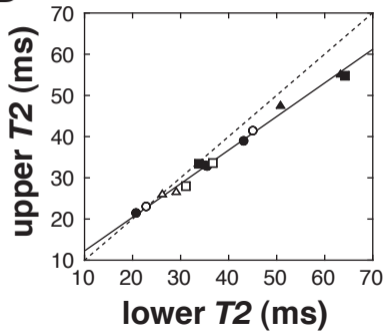

Supplement: pnas_0606749103_1.pdf [file pnas_0606749103_1.pdf]

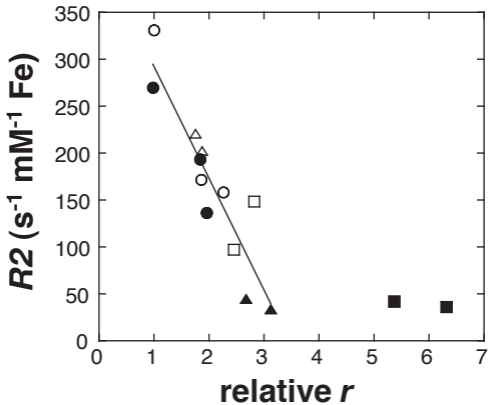

Supplement: pnas_0606749103_2.pdf [file pnas_0606749103_2.pdf]

**A**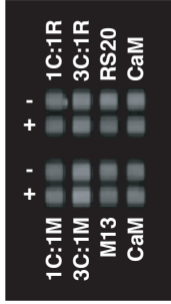**B**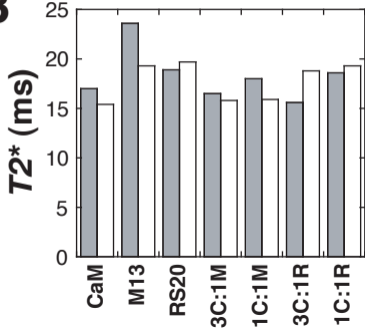

Supplement: pnas_0606749103_3.pdf [file pnas_0606749103_3.pdf]
